# Supplementary material for: Modelling the activity trend of the hydrogen oxidation reaction under constant potential conditions
Source: Royal Society of Chemistry journal article supplement (doi:10.1039/d4cc01825g), 2024-01-01
Supplement: d4cc01825g1.pdf [file d4cc01825g1.pdf]

## Electronic Supplementary Information

### Modelling the Activity Trend of Hydrogen Oxidation Reaction under Constant Potential Conditions

Wenhui Ling, Jian Liu, and Bo Yang\*

School of Physical Science and Technology, ShanghaiTech University, 393 Middle  
Huaxia Road, Shanghai 201210, China

\*Email: [yangbo1@shanghaitech.edu.cn](mailto:yangbo1@shanghaitech.edu.cn)

## 1. Density functional theory calculations

For all density functional theory (DFT) calculations, the Vienna Ab-initio Simulation Package (VASP)<sup>1, 2</sup> was utilized, employing the Projector Augmented-Wave (PAW) method<sup>3, 4</sup> to model electron-ion interactions. To approximate exchange and correlation energies, the Perdew-Burke Ernzerhof (PBE) functional<sup>5</sup> was utilized. A cutoff energy of 400 eV was used, and a convergence criterion for forces of 0.05 eV/Å was applied. A minimum vacuum height of 13 Å was imposed to prevent interactions between periodic structures. The energy associated with the most stable configuration was used in the calculation of free energy for various adsorbates, and the nudged elastic band (NEB)<sup>6</sup> method was employed to locate transition states.

Simulations conducted under constant potential conditions were performed using the grand-canonical density functional theory (GC-DFT)<sup>7</sup> method within the JDFTx software package.<sup>8</sup> The PBE functional was also used here, and an energy cutoff of 14.7 Hartree (400 eV) was employed. Brillouin zone sampling utilized the Monkhorst-Pack scheme<sup>1</sup>. To account for solvation effects, the implicit solvent model CANDLE<sup>9</sup> was employed, with the implicit solvent environment<sup>10-13</sup> providing compensating charges to maintain overall charge neutrality within the unit cell. The parameters were configured for a solvent environment containing 1 M fluoride anions and 1 M sodium cations in an aqueous solution. Additionally, we opted to include two explicit water molecules in the model. On one hand, the implicit solvent model represents the solvent as a continuous medium, simplifying the system complexity and improving computational efficiency. On the other hand, incorporating a small number of explicit water molecules provides a more detailed and accurate description, especially around active sites or key reaction sites, thereby balancing efficiency and accuracy.<sup>14-16</sup>

## 2. Adsorption energy calculations

The free energy of hydrogen adsorption ( $H_2 + 2 * \rightarrow 2H^*$ ) was calculated using the following equation:

$$\Delta G_{H^*} = \frac{1}{2}E_{slab+2H^*} - E_{H_2} - E_{slab} + TS_{H_2} \quad (S1)$$

where  $E_{slab+2H^*}$  and  $E_{slab}$  are the energies of the slab with adsorbed  $2H^*$  and the clean slab, respectively.  $E_{H_2}$  denotes the energy of gaseous  $H_2$ , while  $S_{H_2}$  signifies the entropy of  $H_2$  at 298.15 K, which is 1.36 meV/K.

The activity descriptor of the catalyst should be formulated in a manner that is both straightforward and computationally efficient. We begin by considering the OH

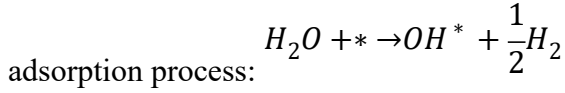

Based on this equation, the OH adsorption energy can be calculated using the following expression:

$$\Delta G_{OH^*} = E_{slab+OH^*} + \frac{1}{2}G_{H_2} - G_{H_2O} - E_{slab} \quad (S2)$$

where  $E_{slab+OH^*}$  is the total energy of the slab with adsorbed  $OH^*$ , while  $G_{H_2}$  and  $G_{H_2O}$  are the Gibbs free energy of  $H_2(g)$  and  $H_2O(l)$ , respectively, which can be calculated using the following equations:

$$G_{H_2} = E_{H_2} - TS_{H_2}$$

$$G_{H_2O} = E_{H_2O} - TS_{H_2O}$$

In the context of this straightforward model, the adsorption process of OH does not involve electron transfer, resulting in exceptionally high computational efficiency for determining the adsorption energy.

By constructing a thermodynamic cycle, we can derive the following relationships:

$$\Delta G_{OH^-} = \Delta G_{OH^*} + G_{H_2O} - \frac{1}{2}G_{H_2} - G_{OH^-} + G_{e^-} \quad (S3)$$

therefore, we can have

$$\Delta G_{OH^-} - \Delta G_{OH^*} = G_{H_2O} - \frac{1}{2}G_{H_2} - G_{OH^-} + G_{e^-} = 0.83 \text{ eV} + eU$$
, according to the

standard Gibbs energy of formation of H<sub>2</sub>O, H<sub>2</sub> and OH<sup>-</sup> at 298.15 K. When the electrode potentials are at 0 V and 0.2 V vs. RHE, we can derive:

$$\Delta G_{OH^-} - \Delta G_{OH^*} = 0.83 \text{ eV} \quad \text{and} \quad \Delta G_{OH^-} - \Delta G_{OH^*} = 1.03 \text{ eV}$$
, respectively.

### 3. Microkinetic simulation

Previous researchers have extensively demonstrated that microkinetic model can help determine the rates of specific steps of catalytic reactions, including reactant adsorption, activation, and the formation of reaction intermediates.<sup>16-19</sup> We employed a similar approach to perform Microkinetic simulation. The rate-determining step (RDS) would be one of the steps within the Tafel step, Indirect Volmer step or Direct Volmer step.

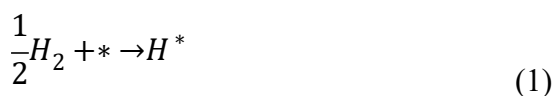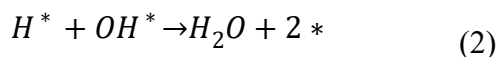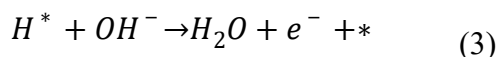

An additional OH<sup>-</sup> adsorption process is involved in Indirect Volmer step:

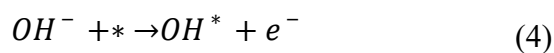

When step (1) is rate-determining in the reaction, other steps are considered quasi-equilibrated, then we can have

$$r = r_1 = k_1\theta^*, \text{ and } k_1 = A \exp\left(-\frac{\Delta G_{TS}^H}{RT}\right)$$

$$\theta^* = \frac{K_4 K_2}{1 + K_4 K_2 + K_4^2 K_2}, \quad K_4 = \exp\left(-\frac{\Delta G_{OH^-}}{RT}\right), \quad K_2 = \exp\left(\frac{(\Delta G_{H^*} + \Delta G_{OH^-})}{RT}\right)$$

It should be noted that step (2) and step (3) are competing in the system, therefore one can consider the rate-determining step being either step (2) or step (3).

When step (2) is rate-determining, we can have

$$r = r_2 = k_2 \theta_H \theta_{OH}, \text{ and } k_2 = A \exp\left(\frac{\Delta G_{H^*} + \Delta G_{OH^-}}{RT}\right)$$

$$\theta_H = \sqrt{p/p^0} K_1 \theta^*, \theta_{OH} = c K_4 \theta^*, K_1 = \exp\left(-\frac{\Delta G_{H^*}}{RT}\right), K_4 = \exp\left(-\frac{\Delta G_{OH^-}}{RT}\right),$$

$$\theta^* = \frac{1}{1 + \exp\left(-\frac{\Delta G_{H^*}}{RT}\right) + \exp\left(-\frac{\Delta G_{OH^-}}{RT}\right)}$$

Similarly, when step (3) is rate-determining, step (1) is considered quasi-equilibrated, the following relations can be obtained:

$$r = r_3 = k_3 \theta_H, \text{ and } k_3 = A \exp\left(-\frac{\Delta G_{TS}}{RT}\right), \theta_H = \frac{K_1}{1 + K_1}, K_1 = A \exp\left(-\frac{\Delta G_{H^*}}{RT}\right)$$

In the above expressions,  $k_i$  and  $K_i$  indicate the forward rate constant and equilibrium constant of step  $i$ , respectively.  $p$  (1 bar in the current work) and  $\theta$  indicates the pressure and intermediates coverage, respectively.  $p^0$  represents the standard pressure, i.e., 1 bar.  $c$  is the molar concentration of  $OH^-$ , which is 0.1 mol/L in the current work, corresponding to  $pH = 13$ .  $\Delta G_{TS}^H$  and  $\Delta G_{TS}$  represent the activation energies of the Tafel and Volmer steps, respectively.  $\Delta G_{H^*}$  and  $\Delta G_{OH^-}$  represent the adsorption energies of H and  $OH^-$ , respectively. The corresponding rate constants ( $k$ ) and coverage ( $\theta$ ) can be calculated as functions of H adsorption energy ( $\Delta G_{H^*}$ ) and OH adsorption energy ( $\Delta G_{OH^-}$ ), with the specific functional relationships provided in Figure 3 of the main

text.  $A$  is the pre-exponential factor which is  $\frac{k_B T}{h}$ ,  $k_B$  and  $h$  represent Boltzmann and Planck constant. The overall reaction rate is given by  $\min(r_1, \max(r_2, r_3))$ . The basic idea is that the overall rate should be equal to the rate of the rate determining step, which shows the lowest reaction rate in the whole reaction pathway and the method has been used in the microkinetic analyses of electrocatalytic reactions.<sup>16, 17, 20</sup>

**Table S1.** Adsorption free energies of H and OH on different catalyst surfaces.

|                                 | $\Delta G_{\text{H}^*}/\text{eV}$ | $\Delta G_{\text{OH}^*}/\text{eV}$ |
|---------------------------------|-----------------------------------|------------------------------------|
| Cu(111)                         | -0.03                             | 0.90                               |
| Ag(111)                         | 0.40                              | 0.95                               |
| Au(111)                         | 0.32                              | 1.55                               |
| Pt(111)                         | -0.24                             | 1.11                               |
| Pd(111)                         | -0.51                             | 0.70                               |
| Ir(111)                         | -0.17                             | 0.79                               |
| Rh(111)                         | -0.32                             | 0.34                               |
| Ru(0001)                        | -0.41                             | -0.14                              |
| PtRu                            | -0.30                             | 0.41                               |
| PdNi                            | -0.28                             | 0.13                               |
| SnRu                            | -0.39                             | 0.05                               |
| RuNi                            | -0.45                             | -0.21                              |
| PtRu(alloy)                     | -0.26                             | 0.05                               |
| GaRu                            | -0.43                             | -0.17                              |
| PdIr <sub>2</sub>               | -0.33                             | 0.45                               |
| IrRu <sub>2</sub>               | -0.34                             | 0.13                               |
| Ir <sub>1</sub> Ru <sub>1</sub> | -0.41                             | -0.03                              |
| PtCu                            | 0.02                              | 1.34                               |
| PtAu                            | -0.52                             | 0.44                               |
| NiCu                            | -0.37                             | 0.03                               |
| PtRu                            | -0.30                             | 0.41                               |
| WNi <sub>4</sub>                | -0.30                             | -1.31                              |
| MoNi <sub>4</sub>               | -0.29                             | -0.88                              |
| 1OH <sub>W</sub>                | -0.38                             | -1.25                              |
| 1OH <sub>Mo</sub>               | -0.37                             | -0.41                              |
| 2OH <sub>W</sub>                | -0.49                             | -0.42                              |
| 2OH <sub>Mo</sub>               | -0.48                             | 0.24                               |

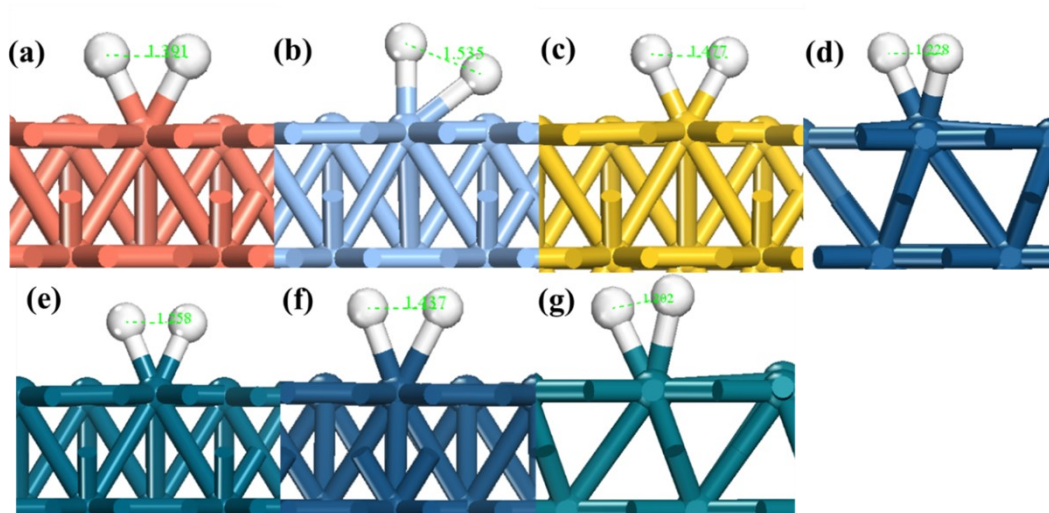

**Figure S1.** Structure of H<sub>2</sub> dissociation step transition state on (a) Cu(111), (b) Ag(111), (c) Au(111), (d) Pt(111), (e) Pd(111), (f) Ir(111) and (g) Rh(111) surfaces. White balls are hydrogen atoms.

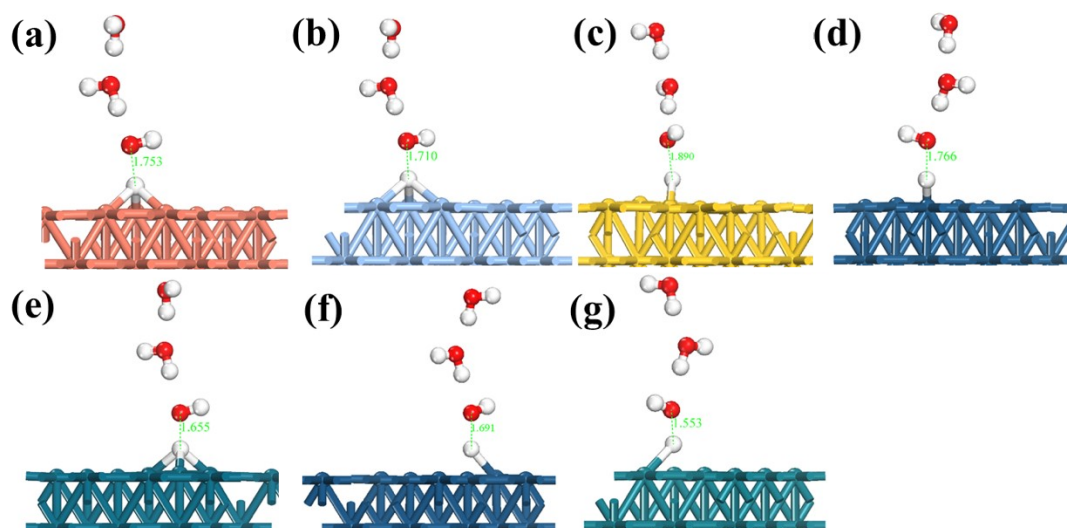

**Figure S2.** Structure of the Direct Volmer step transition state on (a) Cu(111), (b) Ag(111), (c) Au (111), (d) Pt(111), (e) Pd(111), (e) Ir (111) and (g) Rh(111) surfaces. Red and white balls are oxygen and hydrogen atoms, respectively.



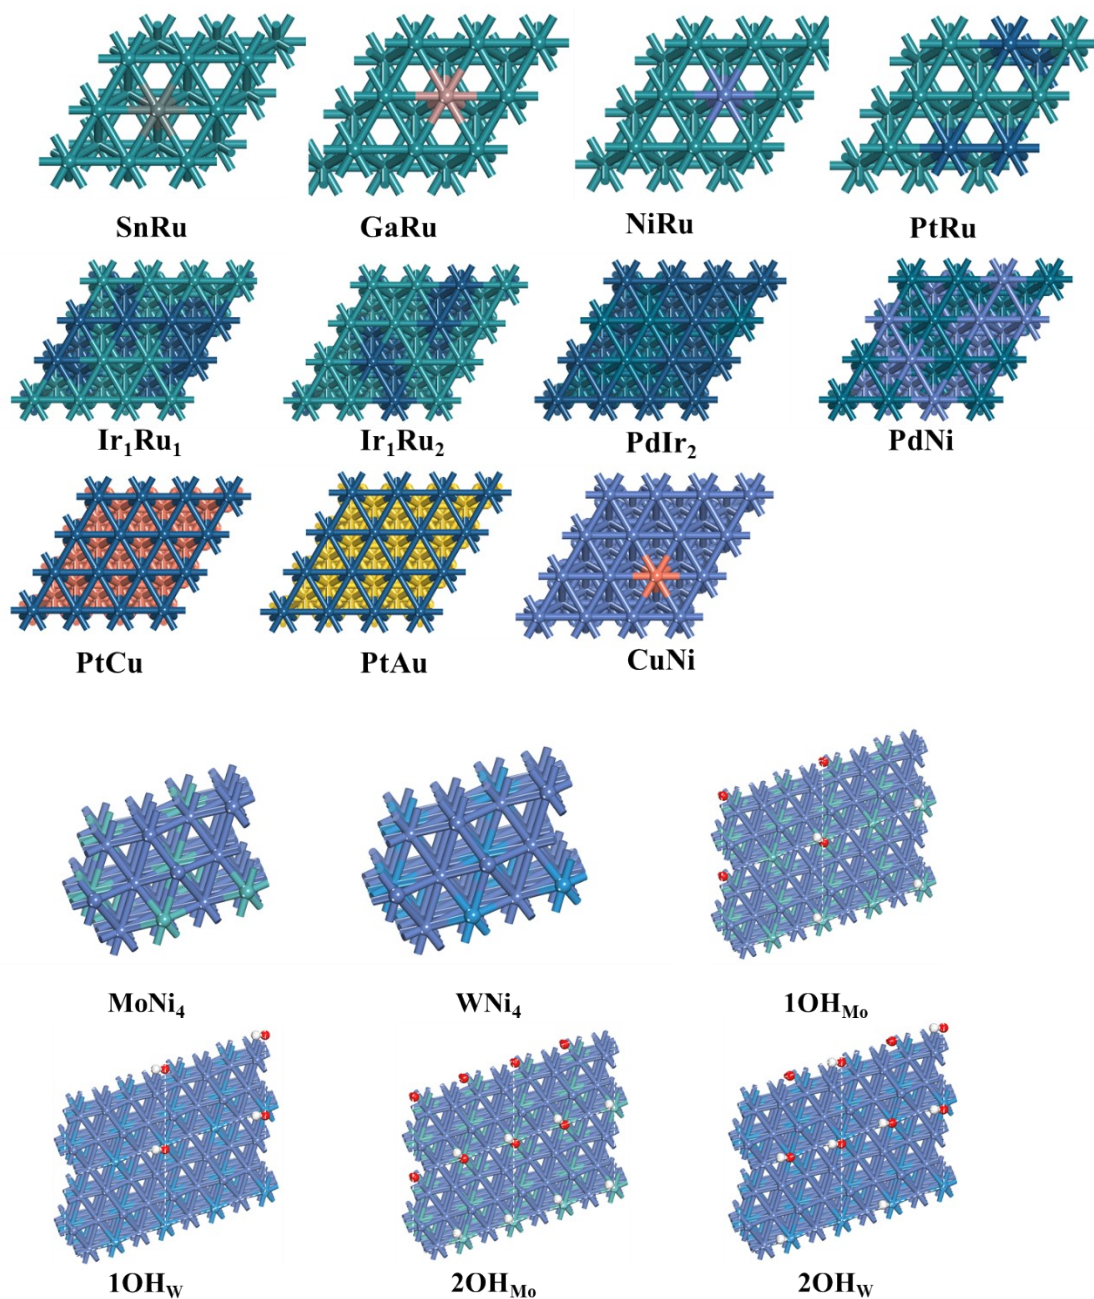

**Figure S3.** Structure of alloy catalysts.

## 5. Input file

Our input files include three types: the first type is the DFT calculation for structural optimization using VASP, the second type uses NEB for transition state search, and the third type conducts simulations under constant potential conditions using JDFTx.

Below is the example input file we provided:

### #DFT input file

general:

System = Cu

ISTART=0

ISPIN=1

ENCUT = 400 eV

PREC=high

ISIF=2

IBRION=2

POTIM=0.2

ALGO=Fast

EDIFFG=-0.05

ISMEAR = 1; SIGMA = 0.10

NSW = 2000

LREAL=A

LWAVE =.False.

GGA=PE

NELM=200

NSIM=4

LCHARG = F

ISYM = 0

LSOL = .TRUE.

EB\_K = 80

## #NEB input file

general:

System = Cu

ISTART=0

ISPIN=1

ENCUT = 400 eV

PREC=high

ISIF=2

IBRION=3 #2structure-opt 3-neb

POTIM=0

#IALGO = 48

ALGO=Fast

EDIFF=1E-7

EDIFFG=-0.03

ISMEAR = 1; SIGMA = 0.10

NSW = 2000

LREAL=A

LWAVE =.False.

GGA=PE

NELM=200

NSIM=4

LCHARG = F

ISYM = 0

LSOL = .TRUE.

EB\_K = 80

ICHAIN=0

IPOT=1

IMAGES=7

SPRING=-5

LCLIMB=.False.

## #JDFTx inputfile

#--- Pseudopotentials ---

ion-species GBRV/\$ID\_pbe.uspp #GBRV family

elec-cutoff 14.7 #Ecuts for psi and rho

elec-ex-corr gga-PBE

include in.lattice

include in.ionpos

coulomb-truncation-ion-margin 4

ionic-minimize \

    nIterations 2000 \

    energyDiffThreshold 0 \

    knormThreshold 1e-3 #Threshold on RMS cartesian force

#--- Electronic ---

kpoint-folding 3 3 1

elec-smearing MP1 0.00184

target-mu -0.1349 #-0.1422 for 0.2V

#--- Fluid ---

fluid LinearPCM

pcm-variant CANDLE

fluid-solvent H2O

fluid-cation Na+ 0.1

fluid-anion F- 0.1

dump-name opt.\$VAR

dump End IonicPositions

dump End ElecDensity

## References

1. G. Kresse and J. Furthmüller, *Phys. Rev. B*, 1996, **54**, 11169-11186.
2. G. Kresse and J. Furthmüller, *Comput. Mater. Sci.*, 1996, **6**, 15-50.
3. P. E. Blöchl, *Phys. Rev. B*, 1994, **50**, 17953-17979.
4. G. Kresse and D. Joubert, *Phys. Rev. B*, 1999, **59**, 1758-1775.
5. J. P. Perdew, K. Burke and M. Ernzerhof, *Phys. Rev. Lett.*, 1996, **77**, 3865-3868.
6. G. Henkelman, B. P. Uberuaga and H. Jónsson, *J. Chem. Phys.*, 2000, **113**, 9901-9904.
7. R. Sundararaman, W. A. Goddard, III and T. A. Arias, *J. Chem. Phys.*, 2017, **146**.
8. R. Sundararaman, K. Letchworth-Weaver, K. A. Schwarz, D. Gunceler, Y. Ozhables and T. A. Arias, *SoftwareX*, 2017, **6**, 278-284.
9. R. Sundararaman and W. A. Goddard, III, *J. Chem. Phys.*, 2015, **142**, 064107.
10. Y. Basdogan, A. M. Maldonado and J. A. Keith, 2020, **10**, e1446.
11. G. Fisicaro, L. Genovese, O. Andreussi, N. Marzari and S. Goedecker, *J Chem Phys*, 2016, **144**, 014103.
12. Y.-H. Fang and Z.-P. Liu, *J. Phys. Chem. C*, 2009, **113**, 9765-9772.
13. A. Y. Lozovoi, A. Alavi, J. Kohanoff and R. M. Lynden-Bell, *J. Chem. Phys.*, 2001, **115**, 1661-1669.
14. M. Li, L. Li, X. Huang, X. Qi, M. Deng, S. Jiang and Z. Wei, *J. Phys. Chem. Lett.*, 2022, **13**, 10550-10557.
15. L. Han, P. Ou, W. Liu, X. Wang, H.-T. Wang, R. Zhang, C.-W. Pao, X. Liu, W.-F. Pong, J. Song, Z. Zhuang, M. V. Mirkin, J. Luo and H. L. Xin, *Sci. Adv.*, **8**, eabm3779.
16. I. T. McCrum and M. T. M. Koper, *Nat. Energy*, 2020, **5**, 891-899.
17. J. Li, H. Liu, J. Liu and B. Yang, *Mater. Today Chem.*, 2023, **29**, 101461.
18. H. Liu and B. Yang, *Chem. Commun.*, 2022, **58**, 709-712.
19. C. Tsai, K. Lee, J. S. Yoo, X. Liu, H. Aljama, L. D. Chen, C. F. Dickens, T. S. Geisler, C. J. Guido, T. M. Joseph, C. S. Kirk, A. A. Latimer, B. Loong, R. J. McCarty, J. H. Montoya, L. Power, A. R. Singh, J. J. Willis, M. M. Winterkorn,

- M. Yuan, Z.-J. Zhao, J. Wilcox and J. K. Nørskov, *Catal. Lett.*, 2016, **146**, 718-724.
20. H. A. Hansen, J. B. Varley, A. A. Peterson and J. K. Nørskov, *J. Phys. Chem. Lett.*, 2013, **4**, 388-392.
